# Supplementary material for: The Relationship Between Sarcopenia and Vitamin D Levels in Adults of Different Ethnicities: Findings From the West China Health and Aging Trend Study&nbsp;
Source: Research Square preprint supplement (doi:10.21203/rs.3.rs-154233/v1), 2021-02-08
Supplement: Supplementary file 1 [file 9c70daf7cd749a8cf556bd4e.doc]

# The West China Health and Aging Trend Study

# Age status verification questionnaire

Subject number：

**Birthdate：**

*****Lunar Calendar： year month day，

Or Gregorian calendar： year month day，

Or the republic of China： year month day，

S1. Name of Respondent：

S2.Age： years old

S3.Sex：Male□； Female□

S4.ID number： Take a picture： Yes□；No□

**S4 3.Birth Place**： province city

Native place province city，Local residence___________years

Is your birthplace the same as your present address?

（1）Yes （2）No

S5. Subject's current address： ________province ________city _________district ________town ___________ street, house number _________________

home telephone：________________________

phone number of the contact：________________________

Relationship between contacts and interviewees：________________

Is there anyone accompanying you：(1) Yes (2) No

S6. Name of accompanying person：____________________

S7. The relationship between your escorts and you：_______________________

# Questionnaire survey

## A. basic personal information

**A1.** degree of education：

| 1)  never went to school | 2)  primary grades | 3)  Junior high school degree | 4)  high school diploma |
| --- | --- | --- | --- |
| 5)  Technical secondary school degree | 6)  College degree | 7)  Bachelor's degree | 8)  Master degree or above |

**A2.** nation： (1) the Han nationality (2) the Mongol nationality (3) the Hui nationality （4）the  Zang or Tibetan nationality （5）the Uyghur nationality （6）the Miao nationality （7）the Yi nationality （8）the Zhuang nationality （9）the Bouyei nationality （10）the Mancu nationality （11）the Dong minority （12）the Yao nationality （13）the Bai nationality  （14）the Hani nationality （15）Kazak (nationality) （16）傣族 （17）other__________

**A3.** marital status： （1） Single （2） Married （3） Divorced （4） Widow

## B. Health condition

**B1.** Chronic diseases

B1-1. Existing chronic disease (confirmed by medical institution):

1=No **----->**Jump to C

2=Yes

| B1-2serial number | **B1-3**disease's name | B1-4Whether sick | B1-5Confirmed time | B1-6treatment condition | B1-7How many medications to take |
| --- | --- | --- | --- | --- | --- |
| 1 | hypertension | 1=No  2=Yes | Year  Month | 1=No cure  2=intermittent  3=Adherence |  |
| 2 | coronary heart disease | 1=No  2=Yes | Year  Month | 1=No cure  2=intermittent  3=Adherence |  |
| 3 | Other cardiovascular diseases | 1=No  2=Yes | Year  Month | 1=No cure  2=intermittent  3=Adherence |  |
| 4 | COPD | 1=No  2=Yes | Year  Month | 1=No cure  2=intermittent  3=Adherence |  |
| 5 | Other respiratory diseases | 1=No  2=Yes | Year  Month | 1=No cure  2=intermittent  3=Adherence |  |
| 6 | gastrointestinal disease | 1=No  2=Yes | Year  Month | 1=No cure  2=intermittent  3=Adherence |  |
| 7 | hepatic disease | 1=No  2=Yes | Year  Month | 1=No cure  2=intermittent  3=Adherence |  |
| 8 | kidney disease | 1=No  2=Yes | Year  Month | 1=No cure  2=intermittent  3=Adherence |  |
| 9 | Stroke (thrombus, hemorrhage, TIA) | 1=No  2=Yes | Year  Month | 1=No cure  2=intermittent  3=Adherence |  |
| 10 | diabetes | 1=No  2=Yes | Year  Month | 1=No cure  2=intermittent  3=Adherence |  |
| 11 | dementia | 1=No  2=Yes | Year  Month | 1=No cure  2=intermittent  3=Adherence |  |
| 12 | Other neurological diseases | 1=No  2=Yes | Year  Month | 1=No cure  2=intermittent  3=Adherence |  |
| 13 | mental disease | 1=No  2=Yes | Year  Month | 1=No cure  2=intermittent  3=Adherence |  |
| 14 | osteoarthropathy | 1=No  2=Yes | Year  Month | 1=No cure  2=intermittent  3=Adherence |  |
| 15 | tumour | 1=No  2=Yes | Year  Month | 1=No cure  2=intermittent  3=Adherence |  |
| 16 | cataract | 1=No  2=Yes | Year  Month | 1=No cure  2=intermittent  3=Adherence |  |
| 17 | epicophosis | 1=No  2=Yes | Year  Month | 1=No cure  2=intermittent  3=Adherence |  |
| 18 | Other Disease | 1=No  2=Yes | Year  Month | 1=No cure  2=intermittent  3=Adherence |  |
| 19 | Other Disease | 1=No  2=Yes | Year  Month | 1=No cure  2=intermittent  3=Adherence |  |
| 20 | Other Disease | 1=No  2=Yes | Year  Month | 1=No cure  2=intermittent  3=Adherence |  |
| 21 | Other Disease | 1=No 2=Yes | Year  Month | 1=No cure  2=intermittent  3=Adherence |  |

## C. Comprehensive geriatric assessment

C1. vision

Ask the patient：

C2-1. Correct the best vision to see clearly：

1. Good: books, newspapers and other nearby small objects
2. Medium: medium objects such as television pictures
3. Poor: can see the figure clearly
4. Very poor: light sensitive only
5. total blindness

C3. hearing

Ask the patient：

C3-1. Can you hear others clearly in your daily life?

1. Good: normal volume, normal speed can hear clearly
2. Middle: You need to speak louder or slower to hear clearly
3. Poor: has difficulty hearing people clearly
4. deaf

C3-2. Have you used a hearing aid in the past month?

1. Yes
2. No
3. The deaf cannot hear clearly
4. refuse to answer
5. be unaware of it

## D. Lifestyle

### D3.Smoking status：

D3-1. Do you smoke？

1. No（Let's go to question D3-5）
2. cannot remember clearly（Let's go to question D3-5）
3. Yes, for six months in a row
4. There are 6 months but not in a row

D3-2. How old were you when you started smoking？ （year）

D3-3 Which of the following cigarettes do you smoke most？（multiple choice）

1. Filterless cigarettes
2. Filter-tipped cigarettes
3. cigar
4. A pipe or hookah
5. Hand - rolled or dry - smoked cigarettes
6. electronic cigarette

How many cigarettes/two do you smoke per week on average?

D3-4. Do you quit smoking？

①No ②Yes Quitting time Years old？

（二）passive smoking (Note that smokers do not answer this part of the question)

**D3-5.** Does anyone you live or work with smoke？**---->** D3-1 Select 3 or 4 to skip this question

1. No ②Yes

**D3-6.** Do you regularly inhale smoke from a smoker's exhaled breath (i.e. passive smoking) for more than 15 minutes per day？**---->** D3-1 Select 3 or 4 to skip this question

1. almost everyday
2. On average, more than three days a week
3. An average of 1-3 days per week
4. The average is less than one day a week
5. No
6. Not clear

### D4. Drinking situation

D4-1. Are you drinking now？

1. No**---Jump to D5-1**
2. I used to drink but now I don't What was your age when you quit drinking Years old？
3. Yes

D4-2. How old did you start drinking？ （years）

D4-3. How often do you drink alcohol？

①Every day or almost every day ②3 to 4 times a week ③1 to 2 times per week

D4-4. What kind of wine do you usually drink？

1. Beer: ml per times
2. fruit wine: : ml per times
3. liquor and spirits: ml per times
4. Medicated wine: ml per times
5. highland barley wine: ml per times
6. red wine: ml per times
7. Others: ml per times
